# Supplementary material
Source: PubMed Central journal article supplement (PMC2651023)
Supplement: NIHMS73793-supplement-ssupplementary.pdf [file NIHMS73793-supplement-ssupplementary.pdf]

|               |     |            |            |             |            |            |
|---------------|-----|------------|------------|-------------|------------|------------|
| <b>BB0210</b> | 301 | TGRVTLGKNR | LKELIKKGLS | NKFQKVNELI  | ENSKNKEASN | LLLTLIKKDI |
| <b>128B</b>   | 1   | -----      | -----      | -----       | -----      | ----LIKKDI |
| <b>15J</b>    | 1   | -----      | -----      | -----       | -----      | ----LIKKDI |
|               |     |            |            |             |            |            |
|               |     |            |            |             | *          |            |
| <b>BB0210</b> | 351 | EPNLINIPKD | PYKKEIFQLD | KEDKKPOYLE  | DLKSKVHSIK | PIDLENTKSR |
| <b>128B</b>   | 7   | EPNLINIPKD | PYKKEIFQLD | KEDKKPOHPG  | DLKSKVHSIK | PIDLENTKSR |
| <b>15J</b>    | 7   | EPNLINIPKD | PYKKEIFQLD | KEDKKPOHPG  | DLKSKVHSIK | PIDLENTKSR |
| <b>300E</b>   | 2   | -----NIPKD | PYKKEIFQLD | KEDKKPOYLG  | DLKSKVHSIK | PIDLENTKSR |
| <b>297K</b>   | 2   | -----      | -----      | -----       | --KSKVHSIK | PIDLENTKSR |
| <b>53D</b>    | 2   | -----      | -----      | -----       | -----      | -----      |
| <b>635B</b>   | 1   | -----      | -----      | -----       | -----      | -----      |
| <b>171Z</b>   | 1   | -----      | -----      | -----       | -----      | -----      |
| <b>1293K</b>  | 1   | -----      | -----      | -----       | -----      | -----      |
|               |     |            |            |             |            |            |
|               |     |            |            |             | *          |            |
| <b>BB0210</b> | 401 | QQAIKDLNEF | LKNNPNDQA  | SKTLAQANKI  | QHLEDLKSKV | HSIKPIDLEN |
| <b>128B</b>   | 37  | QQAIKDLNEF | LKNNPNDQA  | SKTLAQANKI  | QY-----    | -----      |
| <b>15J</b>    | 37  | QQAIKDLNEF | LKNNPNDQA  | SKTLAQANKI  | QY-----    | -----      |
| <b>300E</b>   | 27  | QQAIKDLNEF | LKNNPNDQA  | SKTLAQANKI  | QY-----    | -----      |
| <b>297K</b>   | 20  | QQAIKDLNEF | LKNNPNDQA  | SKTLAQANKI  | QYLXDLKSKV | HSIKPIDLEN |
| <b>53D</b>    | 2   | ----KDLNEF | LKNNPNDQA  | SKTLAQANKI  | QYLEDLKSKV | HSIKPIDLEN |
| <b>635B</b>   | 1   | -----      | -KNNPNDQA  | SKTLAQANKI  | QYLEDLKSKV | HSIKPIDLEN |
| <b>171Z</b>   | 1   | -----      | -KNNPNDQA  | SKTLAQANKI  | QYLEDLKSKV | HSIKPIDLEN |
| <b>1293K</b>  | 1   | -----      | -KNNPNDQA  | SKTLAQANKI  | QYLEDLKSKV | HSIKPIDLEN |
|               |     |            |            |             |            |            |
| <b>BB0210</b> | 451 | TKSRQQAID  | LNEFLKNNPN | DAQASKTLAQ  | ANKIQHLEDL | KSKVHSIKPI |
| <b>128B</b>   | 53  | -----      | -----      | -----       | -----      | -----      |
| <b>15J</b>    | 53  | -----      | -----      | -----       | -----      | -----      |
| <b>300E</b>   | 43  | -----      | -----      | -----       | -----      | -----      |
| <b>297K</b>   | 70  | TKSRQQAID  | LNEFLKNNPN | DAQASKTLAQ  | ANKIQ----- | -----      |
| <b>53D</b>    | 48  | TKSRQQAID  | LNEFLKNNPN | DAQASKTLAQ  | ANKIQ----- | -----      |
| <b>635B</b>   | 40  | TKSRQQAID  | LNEFLKNNPN | DAQASKTLAQ  | ANKIQHLEDL | KSKVHSIKPI |
| <b>171Z</b>   | 40  | TKSRQQAID  | LNEFLKNNPN | DAQASKTLAQ  | ANKIQ----- | -----      |
| <b>1293K</b>  | 40  | TKSRQQAID  | LNEFLKNNPN | DAQASKTLAQ  | ANKIQ----- | -----      |
|               |     |            |            |             |            |            |
| <b>BB0210</b> | 501 | DLNTKSRQQ  | AIKDLNEFLK | NNPNDQAQASK | TLAQANKIQH | LEDLKSKVHS |
| <b>635B</b>   | 90  | DLNTKSRQQ  | AI-----    | -----       | -----      | -----      |

Antonara et al., Figure S1. Alignment of the BB0210 clones selected independently *in vivo* with a portion of the *B. burgdorferi* strain B31 M1 predicted amino acids 301-500. The portion shown represents repeats #1 and #2 in entirety according to the B31 M1 sequence ("BB0210". Individual clones selected *in vivo* are designated by a 2 to 4 digit number followed by a single letter. The repeats begin at the asterisk over D381, and at the asterisk over D435. The 49 amino acid peptide common to all clones selected *in vivo* is highlighted; some clones contain more than one copy but all contain less than two. Please note that we cannot determine precisely which repeats are represented in clones 297K, 53D, 635B, 171Z, and 1293K.

A1952 -----  
B916 -----  
E52 -----  
BB0385\_BmpD ---MLKKVYYFLIFLIFIVACSSSDGKSEAKTVSLIVDGAFDDKGFNESSSKAIRKLLKAD  
BB0383\_BmpA MNKILLLLILLESIVFLSCSGKSLG--SEIPKVSLLIIDGTFDDKSFNESALNGVKKVKEE  
BB0382\_BmpB ---MRIVIFIFGILLTSCFSRNGIESSKKIKISMLVDGVLDDKSFNSSANEALLRLKKD  
BB0384\_BmpC -MFKRFIFITLSELLVFACFKSNKKSISKDKVVVGVLAHGSFYDKGYNQSVHDGVVKKLRDN

A1952 -----  
B916 -----  
E52 -----  
BB0385\_BmpD LNINIIIEK-----ASTGNSYLGDIANLEDGNSNLIWGIGFRLSDILFQRASEN  
BB0383\_BmpA FKIELVLK-----ESSSNS-----YLSGLEGLKDAGSLLIWLIGYRFSVAKVAALQN  
BB0382\_BmpB FPENIEEV-----FSCAISGVYSSYVSDLDNLKRNGSLLIWLVGMYLTDASLLVSSEN  
BB0384\_BmpC FGIKLITKSLRPYPIEGKRLLTVDEAMTEDAYEVQKNPLNLFWLIGYRFSDLVSVKLSYER

A1952 -----  
B916 -----  
E52 -----  
BB0385\_BmpD VSVNYAIIIEGVY-DEIQIPKNLLNISFRSEEVAFLAGYFASKASKTGKIGFVGGVGRGKVL  
BB0383\_BmpA PDMKYAIIIDPIYSNDP-IPANLVGMTFRAQEGAFLTGYIAAKLSKTGKIGFLGGIEGEIV  
BB0382\_BmpB PKISYGIIDPIYGDDVQIPENLIAVVFVRVEQGAFLAGYIAAKKSFSGKIGFIGGMKGNIV  
BB0384\_BmpC PDIYYGIIIDAFDYGDIQVPKNSLAIKFRNEEAFLAGYIAAKMSRKEKIGFLTGPMSEHV

A1952 -----FGDFGLGRSTASNMYR-DGVDIIFAAAGLSGIG  
B916 -----FWPTSWLAKSTFGDFGLGRSTASNMYR-DGVDIIFAAAGLSGIG  
E52 -----FGDFGLGRSTASNMYR-DGVDIIFAAAGLSGIG  
BB0385\_BmpD ESFMYGYEAGAKYANSNIKVVSYQVGTFGDFGLGRSTASNMYR-DGVDIIFAAAGLSGIG  
BB0383\_BmpA DAFRYGYEAGAKYANKDIKISTQYIGSFADLEAGRSVATRMYS-DEIDIHHAAGLGGIG  
BB0382\_BmpB DAFRYGYESGAKYANKDIEIISEYSNSFSDDVDIGRTIASKMYS-KGIDVIHFAAGLAGIG  
BB0384\_BmpC KDFKFGFKAGIFYANPKLRLVSKKAPSLFDKEKGMALFMYKEDKVGVIPIAGITGLG

A1952 VIEAAKELGPDHYIIGVDQDQSYLAPNNVIVSAVKKVDSLMSLTCKKYLETG-VLDGGKT  
B916 VIEAAKELGPDHYIIGVDQDQSYLAPNNVIVSAVKKVDSLMSLTCKKYLETG-VLDGGKT  
E52 VIEAAKELGPDHYIIGVDQDQSYLAPNNVIVSAVKKVDSLMSLTCKKYLETG-VLDGGKT  
BB0385\_BmpD VIEAAKELGPDHYIIGVDQDQSYLAPNNVIVSAVKKVDSLMSLTCKKYLETG-VLDGGKT  
BB0383\_BmpA AIEVAKELGSGHYIIGVDEDQAYLAPDNVITSTTKDVGRALNIFTSNHLKTN-TFEGGKL  
BB0382\_BmpB VIETAKNLGDGYYVIGADQDQSYLAPKNFITSVIKNIGDALYLITGEYIKNNNVWEGGKV  
BB0384\_BmpC VYDAAKELGPKYYVIGLNQDQSYIAPQNVITSIIKDIGKVIYSISSEYIN-NRVFKGGII

A1952 MFLGLKEDGLGLVLNENLKSNEYSEIYNKSLKIGQSIMNGI IKVPYDKVSYDNFVLQMFN  
B916 MFLGLKEDGLGLVLNENLKSNEYSEIYNKSLKIGQSIMNGI IKVPYDKVSYDNFVLQMFN  
E52 MFLGLKEDGLGLVLNENLKSNEYSEIYNKSLKIGQSIMNGI IKVPYDKVSYDNFVLQMFN  
BB0385\_BmpD MFLGLKEDGLGLVLNENLKSNEYSEIYNKSLKIGQSIMNGI IKVPYDKVSYDNFVLQMFN-  
BB0383\_BmpA INYGLKEGVVGFVRNPKMISFELEKEIDNLSS--KIINKEIIVPSNKESYEKFLKEFI--  
BB0382\_BmpB VQMGRLRDGVIGLPN-----ANEFYIKVLER--KIINKEIIVPCNQEEYEYIFIKQILKL  
BB0384\_BmpC IDRGLKEGVIEIVKDPDVLNRLVDEVIDLEN--KIISGEIIVPDSEYAFDLFKSKL---

A1952 DFYADLKIFLILRCFKGFFNCKKFIINLAKGFKFGYYGDVGKIIIFPTTVFLLMLEVFFKG  
B916 DFYADLKIFLILRCFKGFFNCKKFIINLAKGFKFGYYGDVGKIIIFPTTVFLLMLEVFFK-  
E52 DFYADLKIFLILRCFKGFFNCKKFIINLAKGFKFGYYGDVGKIIIFPTTVFLLMLEVFFKG  
BB0385\_BmpD -----  
BB0383\_BmpA -----  
BB0382\_BmpB -----  
BB0384\_BmpC -----

|             |                                    |
|-------------|------------------------------------|
| A1952       | LLKFYFINKEYCLLVKSYFNFKFXILKKI----- |
| B916        | -----                              |
| E52         | LLKFYFINKEYCLXVKSYFNFKINFKKI-----  |
| BB0385_BmpD | -----                              |
| BB0383_BmpA | -----                              |
| BB0382_BmpB | -----                              |
| BB0384_BmpC | -----                              |

Figure S2: Alignment of *in vivo* selected BmpD-containing clones from *B. burgdorferi* strain N40 D10E9 with the BmpD, BmpA, BmpB, and BmpC sequences of *B. burgdorferi* strain B31 M1. The phage clone sequences 3' to the end of the B31 M1 BmpD open reading frame likely represent an extension of the protein in the N40 D10E9 genome, as they do not include vector sequences. The *in vivo* selected clones are designated by a single letter followed by a 2 to 4 digit number.

```

ErpK-J1613 VLTISCKNYAASDKGVKGAEQNLEKKVKGFLDTKKEELIGGLKTLGVEISPKVK--ELMQADEGAQGQAAEEQVAQGPSE
ErpK-J1652 -----KGXEQNLEKKVKGFLDTKKEELIGGLKTLGVEISPKVK--ELMQADEGAQGQAAEEQVAQGPSE
ErpK-J1653 -----KGXEQNLEKKVKGFLDTKKEELIGGLKTLGVEISPKVK--ELMQADEGAQGQAAEEQVAQGPSE
ErpK-J1655 VLTISCKNYAASDKGVKGAEQNLEKKVKGFLDTKKEELIGGLKTLGVEISPKVK--ELMQADEGAQGQAAEEQVAQGPSE
OspG-A1524 -----KVEELMQADR-PQVQAAEEQVAQGVFE
OspG-D830 -----MQADR-PQVQAAEEQVAQGVFE
OspG-D831 -----MQADR-PQVQAAEEQVAQGVFE
BBK2.10-D829 -----MQADR-PQVQAAEEQVAQGVFE
BBK2.10-A4 -----MQADR-PQVQAAEEQVAQGVFE
BBK2.10-B103 -----MQADR-PQVQAAEEQVAQGVFE
ErpL-E165 -----KVEELMQADR-PQVQAAEEQVAQGVFE
ErpL-J1616 -----

```

```

ErpK-J1613 GSKLQEE----IKQKIKEL-----
ErpK-J1652 GS-----
ErpK-J1653 GSKLQAX--TQLNRNIKEITFGQTSHP-----
ErpK-J1655 GSKLQEE----IKQKIKEL-----
OspG-A1524 DPPELKEKGLEEKIEELKELKLDSSKTKEDRKKLEEAQKLEEFKRRQVESVTENT--DKVKNQGKIGREAFLYAKKLG
OspG-D830 DPPELKEKGLEEKIEELKELKLDSSKTKEDRKKLEEAQKLEEFKRRQVESVTENT--DKVKNQGKIGREAFLYAKKLG
OspG-D831 DPPELKEKGLEEKIEELKELKLDSSKTKEDRKKLEEAQKLEEFKRRQVESVTENT--DKVKNQGKIGREAFLYAKKLG
BBK2.10-D829 DPPELKEKGLEEKIEELKELKLDSSKTKEDRKKLEEAQKLEEFKRR-----
BBK2.10-A4 DPPELKEKGLEEKIEELKELKLDSSKTKEDRKKLEEAQKLEEFKRRQVESVTENT--DKVKNQGKIGREAFLYAKKLG
BBK2.10-B103 DPPELKEKGLEEKIEELKELKLDSSKTKEDRKKLEEAQKLEEFKRRQVESVTENT--DKVKNQGKIGREAFLYAKKLG
ErpL-E165 -----KFKELEESLAKKKGERKKALQEAQKFEFYKQVDTSTGKTQGDRSKNRGGVGVQAWQCANELGL
ErpL-J1616 -----KFEFYKQVDTSTGKTQGDRSKNRGGVGVQAWQCANELGL

```

```

ErpK-J1613 -----
ErpK-J1652 -----
ErpK-J1653 -----
ErpK-J1655 -----
OspG-A1524 NGSYSANDG-----
OspG-D830 NGSYSANDG-----
OspG-D831 NGSYSANDGXCGXPRXQIHXLGSGKDD-----
BBK2.10-D829 -----
BBK2.10-A4 NGSYSANDGT-----
BBK2.10-B103 NGSYSAND-----
ErpL-E165 GVSYS-NGGSDNSNTDELANKVIDDSLKKIEEELKGI EEDKKE
ErpL-J1616 GVSYS-NGGSDNSNTDELANKVIDDSLKKIEEELKGI EEDKKE

```

Figure S3: Alignments of the OspF family clones representing ErpK (BBM38), OspG (BBS41), BBK2.10 (most closely related to OspF or BBR42), and ErpL (BBO39) selected *in vivo*. ErpK, OspG, and BBK2.10 containing clones share one motif (highlighted), while OspG, BBK2.10, and ErpL containing clones share a second motif (highlighted). Individual clones are designated by a letter followed by 1 to 4 digit numbers.

```

42D -----
971G -----
902K -----
116A -----KGGGDAGDANAGAGNLFNGAGATA
196Q -----

42D -----KAIADAAK-----AAAVDVGEXXIGNVAANNNAADKDSVNGIAKGMKG
971G -----KAIADAAK-----AAAVDVGEEKIGNVA-NNGGAADKDSVNGIAKGMKG
902K -----KAIVDAAEGEQQEGQAAVDVGEEKIGNVVTNNGGAA DAGSVNGIAKGMKG
116A EQAGKAAA AVNAVSGEQILKAIVDAA GDEQQGQA-----AGAA TNPI SAAI GTAEAG
196Q -----KAIVDAAEGEQQ-GAA-----ANAA TNPI SAAI GAAQAG

42D I--VDAADGGKELKGGAGDGGAAANANGDAGHLFAGNGAG-ASAEQAGKAAA AV-----
971G I--VDAADGGKELKGG-GDAGDANAG--AGNLFNGAX-CYC-----
902K I--VDAADGEKELKGGDGGGNANAD--AGHLFAGNAGNGASAAQAGKAAA AVNAVSGEQILL
116A ANFGAAMNGNDKIAAAI VLRGMAKNG--KFAVQNGNGAQDSV-----
196Q GNF-AMNGNDKIAAAI VLRGMAKDG--KFAVQDANGAQDSVKS AVASGGAADAXQCKWDC--

```

Figure S4: Alignment of VIs clones selected *in vivo*. Residues common to all *in vivo* selected clones are highlighted in yellow, one conservative A/V polymorphism within the shared peptide is shaded gray. Individual clones are designated by a 2 to 3 digit number followed by a letter.

Table S1: Summary of *in vivo* phage selections.

| <i>selected pool</i>        | <i>starting pool</i> | <i>selection tissue</i> | <i># sequenced</i> <sup>1</sup> | <i>titers in tissues</i> <sup>2</sup>                                                                                                                                              |
|-----------------------------|----------------------|-------------------------|---------------------------------|------------------------------------------------------------------------------------------------------------------------------------------------------------------------------------|
| A                           | 3                    | heart                   | 46                              | heart ( $1.78 \times 10^{10}$ ) ><br>kidney ( $5.14 \times 10^9$ ) ><br>tibiotarsus ( $4.22 \times 10^9$ ) ><br>spleen ( $2.25 \times 10^9$ ) ><br>bladder $1.59 \times 10^9$ )    |
| B                           | 3                    | heart                   | 49                              | heart > spleen > kidney ><br>tibiotarsus > bladder                                                                                                                                 |
| D                           | 1                    | heart                   | 73                              | heart > spleen > kidney ><br>tibiotarsus > bladder                                                                                                                                 |
| E                           | 1                    | heart                   | 45                              | heart > tibiotarsus ><br>bladder                                                                                                                                                   |
| F                           | 1                    | heart                   | 51                              | heart > tibiotarsus ><br>bladder                                                                                                                                                   |
| G                           | 2                    | heart                   | 41                              | heart > spleen > bladder<br>> tibiotarsus > kidney                                                                                                                                 |
| J                           | 1                    | tibiotarsus             | 43                              | tibiotarsus ( $1.8 \times 10^{10}$ ) ><br>spleen ( $8.86 \times 10^9$ ) ><br>heart ( $6.09 \times 10^8$ ) ><br>kidney ( $2.32 \times 10^8$ ) ><br>bladder ( $3.93 \times 10^7$ )   |
| K                           | 2                    | tibiotarsus             | 44                              | tibiotarsus > spleen ><br>heart > bladder                                                                                                                                          |
| Q                           | 2                    | tibiotarsus             | 54                              | tibiotarsus > spleen ><br>kidney > heart > bladder                                                                                                                                 |
| Z                           | 1                    | bladder                 | 58                              | bladder > spleen ><br>tibiotarsus > heart ><br>kidney                                                                                                                              |
| unselected<br>vector        | N/A <sup>3</sup>     | Not Applicable          | Not<br>Applicable               | spleen ( $>10^{13}$ ) ><br>heart ( $7.13 \times 10^{10}$ ) ><br>tibiotarsus ( $5.34 \times 10^{10}$ ) ><br>kidney ( $2.66 \times 10^{10}$ ) ><br>bladder ( $1.35 \times 10^{10}$ ) |
| unselected<br>library pools | 1, 2, 3              | Not Applicable          | Not<br>Applicable               | spleen > heart > bladder<br>> kidney > tibiotarsus                                                                                                                                 |

<sup>1</sup>A total of 504 clones were sequenced, from which 289 individual *B. burgdorferi* genes were identified. Thirty of these were single “hits” that were not analyzed further. Twenty-three genes were isolated twice, 8 genes were isolated 3 times, 7 were isolated 4 times, and 20 were isolated 5 or more times. All clones corresponded to predicted or known *B. burgdorferi* gene fragments and were in frame with phage gene III.

<sup>2</sup>In some experiments not all tissues were analyzed due to time and space constraints, as each homogenate was tested at multiple dilutions. Specific titers are provided for representative pools and are presented as phage/gram tissue. Although we aimed for a minimal phage input of 1 to  $5 \times 10^{10}$  total phage/mouse, in some cases that number was exceeded. Experiments in which the input phage numbers were lower were not analyzed due to limited phage recovery from some tissues.

Table S2: Primers and reaction conditions for quantitative PCR and cloning of *bbB19* and *bbM38* fragments.

| <i>target</i>                    | <i>primer 1, 5' → 3'</i>                            | <i>primer 2, 5' → 3'</i>                                       | <i>annealing temperature, time</i>       | <i>extension temperature, time</i>       |
|----------------------------------|-----------------------------------------------------|----------------------------------------------------------------|------------------------------------------|------------------------------------------|
| <i>vector (fd)</i> <sup>1</sup>  | GTGACGAAACTC<br>AGTGTTACGG                          | GAGAAGGATTA<br>GGATTAGCGGG                                     | in parallel<br>with each<br>target below | in parallel<br>with each<br>target below |
| <i>bb0210</i> <sup>2</sup>       | CCTAGGATCCAA<br>GCCTCAGTACCT<br>AGAGGACCTTA         | <u>GTTGGTTCGACTT</u><br>AGTACTGTATTT<br>TATTAGCTTGAG<br>CTAAAG | 55°C, 45 sec.                            | none                                     |
| <i>bb0603 (p66)</i> <sup>3</sup> | GTTTTGCACCTAT<br>GACTGG                             | CCTTGATATGTT<br>TTATTGTATGG                                    | 60°C, 60 sec.                            | 72°C, 30 sec.                            |
| <i>bbB19 (ospC)</i>              | GTGAGGATCCAA<br>AGGGCCTAATCTT<br>ACAGAAATAAG        | <u>CTCTGTCGACTT</u><br>AAGTACCATT<br>GTTTTTAAAATA<br>GCCGC     | 60°C, 60 sec.                            | 72°C, 30 sec.                            |
| <i>bbA24 (dbpA)</i>              | AAAGACTGGAAG<br>TAGTGGTGAA                          | GTTGTAGGGTGT<br>TGATCAGCCGC                                    | 57°C, 60 sec.                            | 72°C, 30 sec.                            |
| <i>bbM38 cloning</i>             | GAGAGGATCCGT<br>TAAAGGATTTT<br>GATACAAAAAAG<br>GAAG | <u>CTCTGTCGACTT</u><br>AACTAGGCCCT<br>TGAGCCACTTG              | 53°C, 30 sec.                            | 72°C, 30 sec.                            |
| <i>bbB19 cloning</i>             | GTGAGGATCCAA<br>AGGGCCTAATCTT<br>ACAGAAATAAG        | <u>CTCTGTCGACTT</u><br>AAGTACCATT<br>GTTTTTAAAATA<br>GCCGC     | 53°C, 30 sec.                            | 72°C, 30 sec.                            |

Except where noted, the final MgCl<sub>2</sub> concentrations were 2.5 mM. Underlined sequences indicate restriction sites incorporated into primers for subsequent cloning. The *B. burgdorferi* sequences start immediately after the restriction sites.

<sup>1</sup>The vector sequence was amplified in parallel with each of the *B. burgdorferi* genes, so the primers were optimized to perform under the variety of conditions required.

<sup>2</sup>MgCl<sub>2</sub> was added to a final concentration of 4.5 mM for this primer set.

<sup>3</sup>MgCl<sub>2</sub> was added to a final concentration of 3.5 mM for this primer set.
